# Supplementary material for: The difference in serum proteomes in schizophrenia and bipolar disorder
Source: PubMed Central journal article supplement (PMC6620192; doi:10.1186/s12864-019-5848-1), 2019-07-11
Supplement: 12864_2019_5848_MOESM3_ESM.pdf [file 12864_2019_5848_MOESM3_ESM.pdf]

## **Informed consent statement**

I hereby give my consent to participate in the research project «The difference in serum proteomes in schizophrenia and bipolar disorder».

Responsible executive: Liudmila Smirnova, MD, PhD.

Address: 634014 Tomsk, 4 Aleutskaya Street. Telephone: +7 (3822) 72-43-79

I am aware of the following statements:

- \* The examination is still experimental
- \* The objectives of this study
- \* Possible risks

I have received the above information in writing and got answers to all my questions.

I give my consent to the investigators to review my medical record, provided ensure the professional confidentiality.

I am aware that I have the right to terminate my participation in the study anytime and receive appropriate testing and treatment.

I agree to the fact that the information about me is entered into legally protected database. I have the right to access these data and, if necessary, correct it with the doctor.

**Full name of patient:** \_\_\_\_\_

Date \_\_\_\_\_

Signature \_\_\_\_\_

**Full name of investigator:** Liudmila Smirnova

Date \_\_\_\_\_

Signature \_\_\_\_\_

Address: 634014 Tomsk, 4 Aleutskaya Street. Telephone: +7 (3822) 72-43-79
